# Supplementary material
Source: Springer Nature journal article supplement (https://www.springermedizin.de/resource/supplementary/12990_2010_301_MOESM4_ESM.pdf/9612984)

a

## MT infusion sites

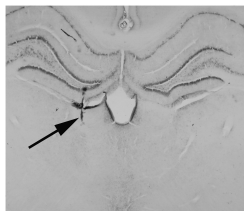

1 mm

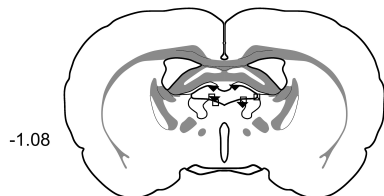

-1.08

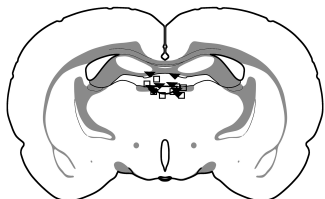

-1.78

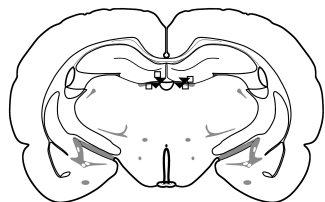

-2.85

1 mm

- ▼ MT-Pre-testing-Lidocaine
- ◻ MT-Post-training-Lidocaine

b

Retention test  
(Post-training infusion into the MT)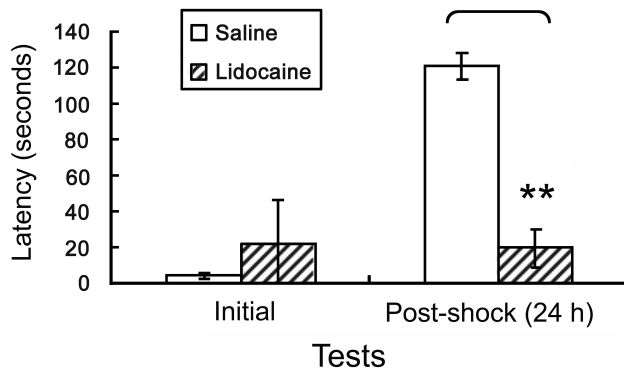

c

Retention test  
(Pre-testing infusion into the MT)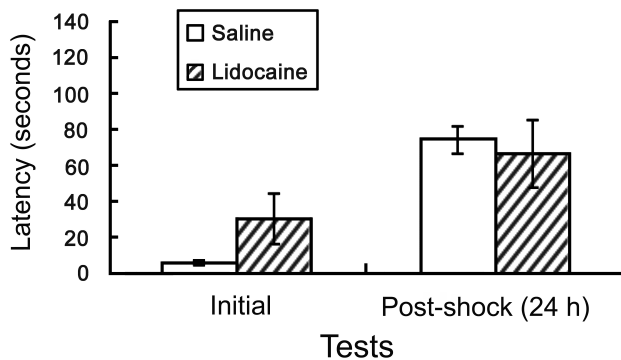

Supplement: MOESM4 [file 9612984]
